# Supplementary material for: Radiocatalytic synthesis of ammonia under ambient conditions with efficiency exceeding that of Haber–Bosch process
Source: Research Square preprint supplement (doi:10.21203/rs.3.rs-4383337/v1), 2024-06-12
Supplement: Supplementary file 1 [file 12b0548c8805c63b884bee90.docx]

Supplementary Information for

**Radiocatalytic synthesis of ammonia under ambient conditions with efficiency exceeding that of Haber–Bosch process**

Changjiang Hu1, Junyi Zhao1, Zhiwen Jiang1, Degao Wang2, Xiaoping Ouyang3,

Shuao Wang4*, Jun Ma 1*

*1 School of Nuclear Science and Technology, University of Science and Technology of China, Hefei, Anhui 230026, China.*

*2Engineering Laboratory of Advanced Energy Materials, Ningbo Institute of Materials Technology and Engineering, Chinese Academy of Sciences, Ningbo, Zhejiang 315201, China*

*3Northwest Institute of Nuclear Technology, Xi'an 710024, China*

*4State Key Laboratory of Radiation Medicine and Protection, School for Radiological and Interdisciplinary Sciences (RAD-X), Soochow University, Suzhou 215123, P. R. China*

*These authors contributed equally: Changjiang Hu, Junyi Zhao*

E-mails: majun0502@ustc.edu.cn; shuaowang@ suda.edu.cn

**Part 1 Comparison with other reported methods.**

**Supplementary Table 1**. The comparison of catalytic activity in production NH3 production using different.

| Method | Conditions | Efficiency of catalyst  (NH3, μmol/g/s) | Energy conversion  (MJ/mol) |
| --- | --- | --- | --- |
| Radiocatalysis | R.T.，1bar | **48** | **17** |
| Haber-Bosch 1,2 | 300-500 °C, 1-90 bar | 1.54-12.5 | 662 1 |
| Electrochemical 3-6 | R.T., 1~20 bar | 0.0002~0.15 μmol/cm/s | 35.7~3876 |
| Photochemical 7 | Light, 1000 °C | 0.00046 | 64 |
| Mechanochemical 8 | 45℃，1bar | 0.013 | 76.5 |
| Plasma 9 | R.T.，1bar | 0.0072 | 138 |
| Laser 10 | R.T.，1~7.5 bar | 32.8 | 19.7 |

The method for calculating energy consumption: the energy consumption equals the sum of energy needed to fix equivalent N* and hydrogenation to produce 1 mol ammonia. The calculation of the energy efficiency of radiocatalysis was based on the conversion of the G (NH3) value of radiation yield.

The effects on the energetic cost of the electrochemical NRRs illustrated in Figure 3b are calculated according to this equation:

**Part 2 Supplementary methods**

**Chemicals and materials**

Hafnium(IV) chloride (HfCl4, 98%, Sigma), 2-hydroxyterephthalic acid (BDC-OH, 98%, Macklin), 2-aminotereph thalic acid (BDC-NH2, 99%, Sigma), sodium sulfiye (98.0%, Aladdin), methanol (99.5%, Aladdin), sulfur dioxide solution (SO2 ≥ 6%, Alfa), acetic acid ( ≥ 99%, Sigma), hydrochloric acid (AR, 37%), KOH (99.9%, Aladdin), NaOH (99.9%, Aladdin), salicylic acid (99.5%, Aladdin), sodium citrate dihydrete (99%, Aladdin), NaClO (6%-14%, Aladdin), and Sodium nitroferricyanide(III) dihydrate Na2[Fe(CN)5NO]•2H2O (99.98%, Aladdin) were used. All chemicals were used without further purification.

**Radiation dose calibration**

The Fricke dosimeter system obtained by the national standard method (GB T 139-2008) was accepted to calibrate the X-ray dose. The dosimeter configuration was shown in the following listing. A mixture containing 392 mg of (NH4)2Fe(SO4)2∙6H2O, NaCl (58 mg), 0.4 mol/L H2SO4 (22.5 ml), was dissolved in a 1L volumetric flask and diluted with air-saturated sulfuric 0.4 mol/L H2SO4 solution to volume. The absorbed dose range should be from 20 to 400 Gy. Net absorbance (Δ) was derived from the ultraviolet absorbance of a solution before () and after () irradiation. Fricke solution absorbed dose values are calculated using the following formula:

– chemical yield for the irradiation energy

– molar extinction coefficient

– optical pathway

– solution density

***G* (****NH3) calculation**

|  |  |
| --- | --- |
|  |  |

Where n(NH3) is the amount of NH3 produced by radiolysis, *waq*, and *wM* are the mass fraction of water and catalyst in the mixture, and *γaq* and *γM* are the respective absorbed doses of the water and catalyst. However, in our experiment, the weight of the catalyst ranged from 0.06 %, much less than that of H2O content, so the contribution to the total absorbed dose was ignored. The value of *γaq* was measured by the Fricke dosimeter and finally used as the total absorbed dose.

**X-ray/electron beam-driven catalytic conversion of N2 to NH3**

The X-ray-driven NRR experiment was finished in a 300 mL continuous aeration reactor using a panoramic X-ray source (160 keV, 20 mA) with a dose rate of 0.81 kGy h-1 at room temperature (Figure S1). In a typical experimental process, 600 mg of UiO-66(Hf)-NH2 was dispersed into 150 mL H2SO3 solution (1.25 mL sulfur dioxide solution in 150 mL deionized water) with different pH-concentrated HCl as a regulator. Then, the mixture was bubbled with high-purity N2. 3 mL of the filtered reaction liquid was detected by ion chromatography (IC), 1H nuclear magnetic resonance (NMR) method, and indophenol blue method.

During the experiment on NH3 synthesis using an electron beam, 400 mg catalyst was dispersed in a 100 mL solution of H2SO3 (1.25 mL sulfur dioxide solution in 150 mL deionized water) saturated with N2. The mixture was then transferred to a 1200 mm petri dish and irradiated using a 1 MeV electron beam with a different current. This experimental setup proved more effective than an open system. Liquid products are detected by the same method as above.


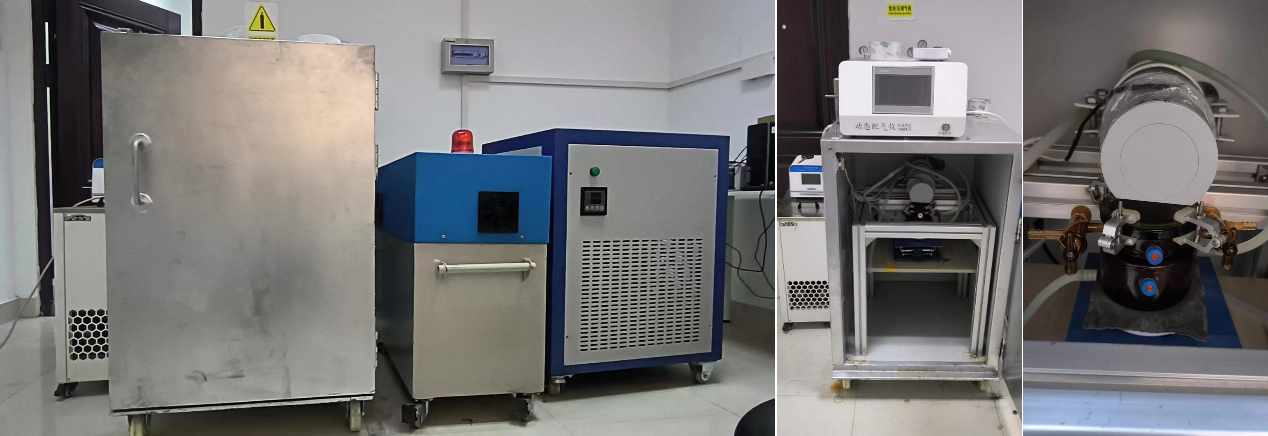


**Supplementary Fig. 1.** 300 mL continuous aeration reactor using a panoramic X-ray source (160 keV, 20 mA).


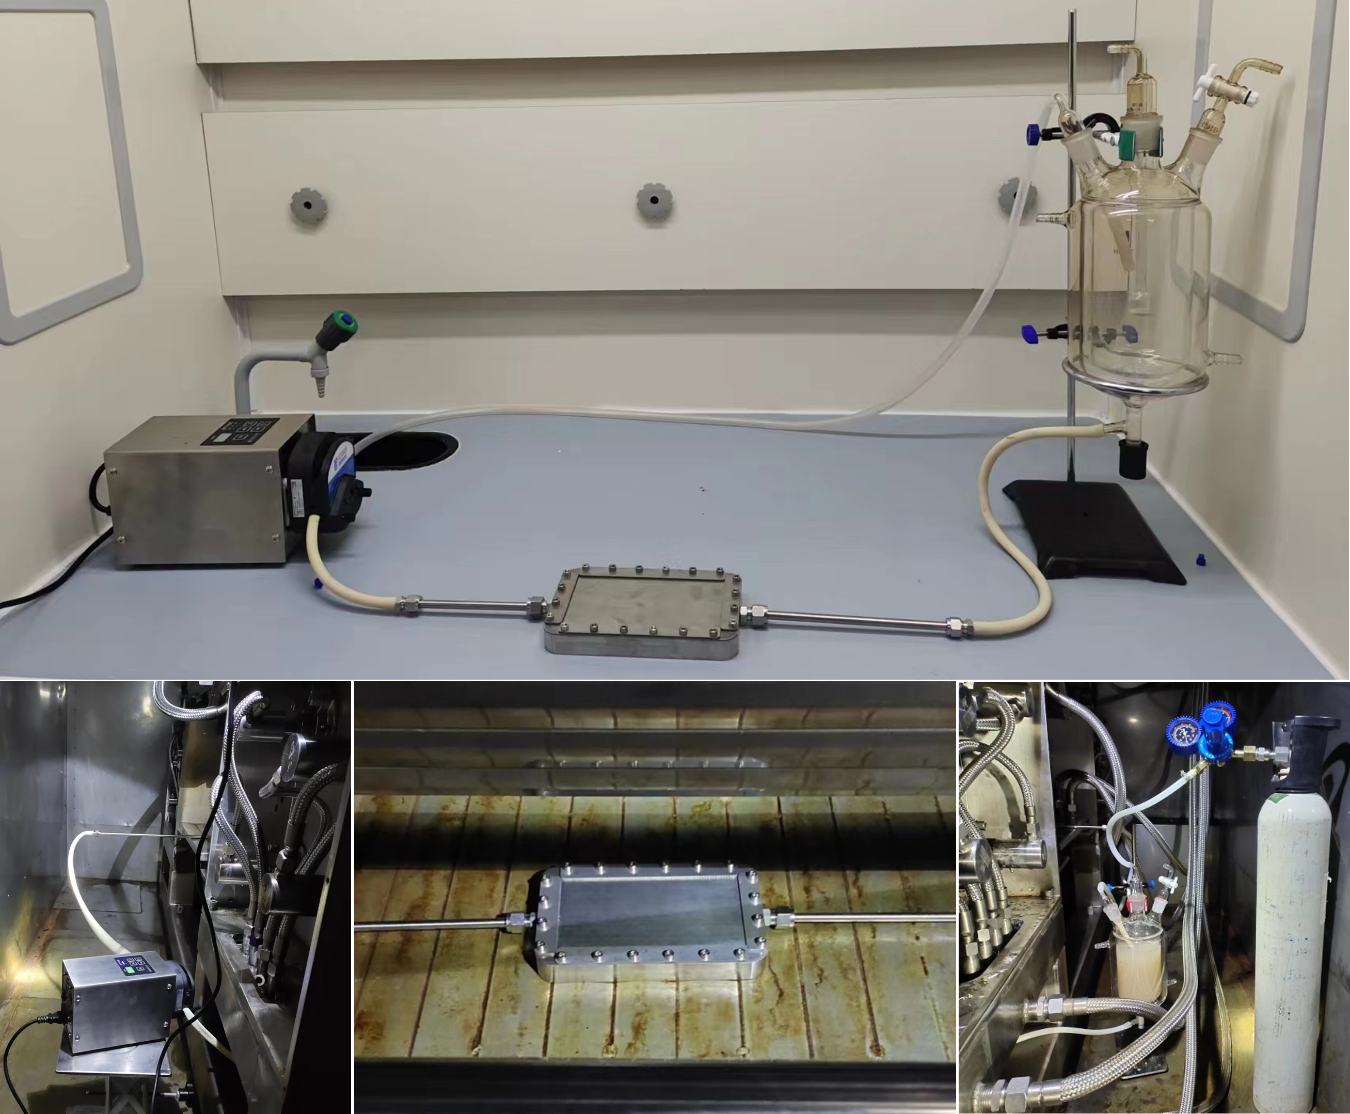


**Supplementary Fig. 2.** The assembled continuous-flow reactor for NRR. The dimension of the flow cell was 15 cm×8 cm×2 cm with a 1mm titanium plate as a sealing layer. The effective area of the reactor with the gasket was 90 cm2. Additionally, a gas-liquid separator with a volume of 1.5L was incorporated.

**
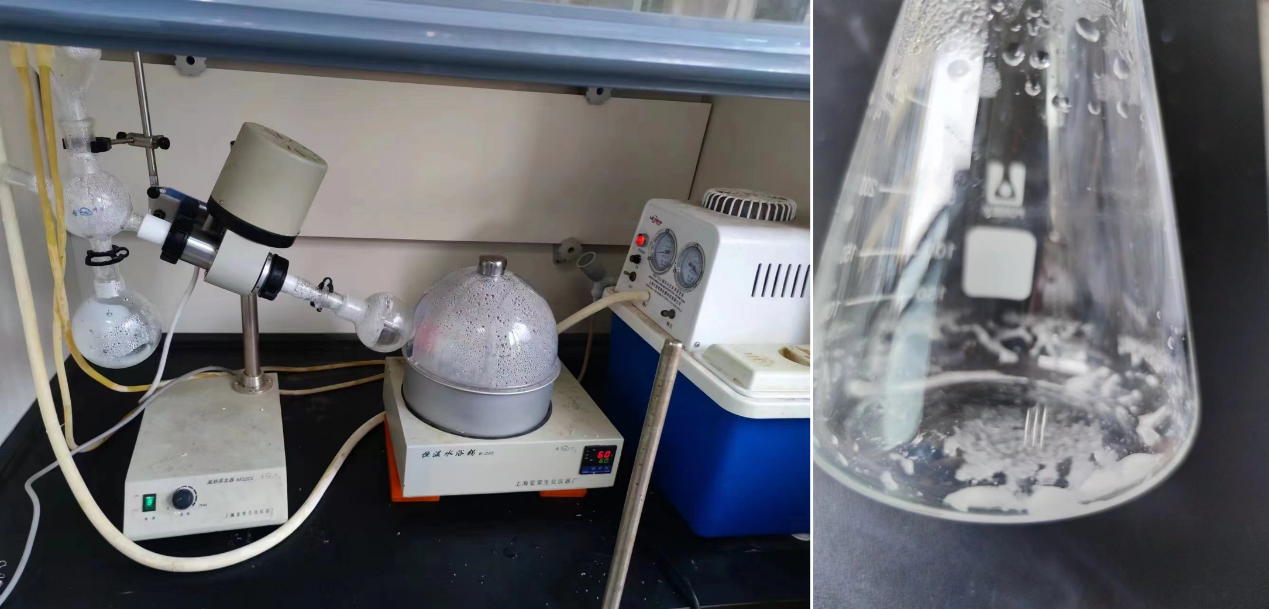
**

**Supplementary Fig. 3.**A rotary evaporator is used to evaporate 180 mL of the reaction liquid within a continuous reactor after 30 minutes of irradiation, resulting in the formation of a solid product.


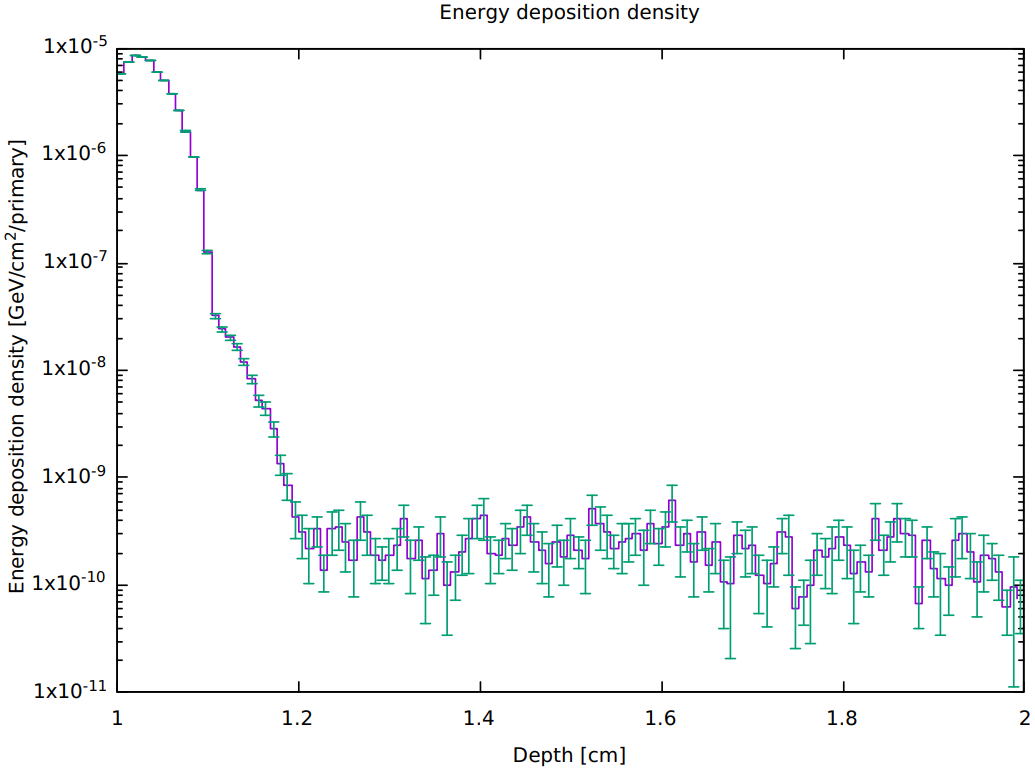


**Supplementary Fig. 4.** Energy deposition of aqueous solution in a continuous reactor after electron beam energy penetrating 1mm titanium plate.

**Part 3 Ammonia quantification**

**Detection of produced ammonia and performance evaluation**

The generated ammonia was detected and quantified after the hydrolysis of UiO-66(Hf)-NH2 in 150 mL solution with different pH (2, 3, and 6) containing a certain amount of H2SO3.

The NH4+ concentration in acid traps was quantitatively determined by the ion chromatograph (IC) system, indophenol blue spectrophotometric method, and 1H nuclear magnetic resonance.

**Determination of NH3 by ion chromatography method.**

The NH4+ concentration was quantified by the IC system (YYIC-1600). 100 ppm NH4+ was added to a solution with different pH (2, 3, and 6) containing a certain amount of H2SO3, diluted to an appropriate concentration, and then injected into the IC system to obtain a series of peak heights. The standard curve was prepared by correlating the NH4+ concentration and the peak height. Then, through the standard curves, we can get the concentration of the samples.

**Determination of NH3 by indophenol blue spectrophotometric method.**

The concentration of NH4+ was detected by the indophenol blue spectrophotometric method. Ammonia standard solutions were prepared by diluting 100 ppm NH4+ stock solution under different pH conditions (1, 2 and water) in designated concentrations. 2 mL color solution (1 M NaOH, 5 wt% salicylic acid and 5 wt% sodium citrate), 1 mL oxidizing solution (0.38 M NaClO) and 0.2 mL catalysts solution (1 wt% sodium nitroferricyanide dihydrate) were mixed with 2 mL above the diluted solution. After 2 h at room temperature, the absorption spectrum was measured using a UV-Vis spectrophotometer (UV-3300). NH4+ standard curve was constructed by correlating standard solution concentrations with absorbances at the wavelength of 655 nm. The same procedure was used to quantify the amount of NH4+ in stability test samples.

**Determination of NH3 by 1H nuclear magnetic resonance (1H NMR).**

50 μL of 1 mM Maleic acid was used as the internal standard; 50 μL of DMSO-d6 was used for a spin-lock field. The above solutions were added to 900 μL of ammonia in aqueous media. After shaking up, 600 μL of the above-mixed solution was added into an NMR tube. 1H NMR measurements were done on a Bruker 400MHz AVANCE III HD with a cryoprobe. Standard Bruker pulse sequence (pulse program: zgesgp) was used to suppress the solution water 1H signal and acquire NMR data. The NS were set to be 256, respectively. All the 1H NMR spectra were processed by Mnova.

**Supplementary Fig. 5.** The standard working curve for the amount of NH4+ in the pH=2 solution using IC.

**Supplementary Fig. 6.** The standard working curve for the amount of NH4+ in the pH=3 solution using IC.

**Supplementary Fig.7.** The standard working curve for the amount of NH4+ in the pH=6 solution using IC.

**
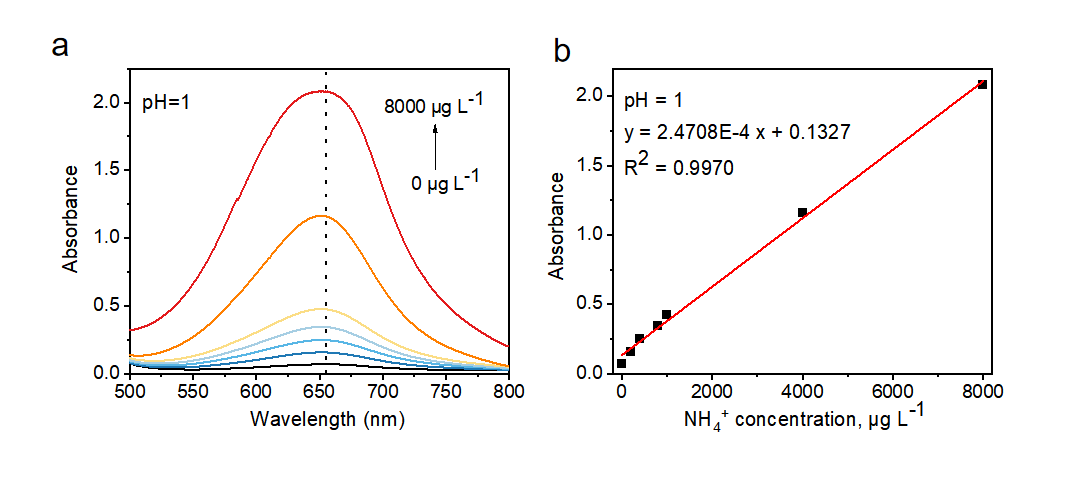
**

**Supplementary Fig. 8.** (**a**) UV-Vis spectra of various NH4+ concentrations at pH=1. (**b**) Calibration curve of the absorbance at 655 nm versus the concentration of NH4+ at pH=1.

**
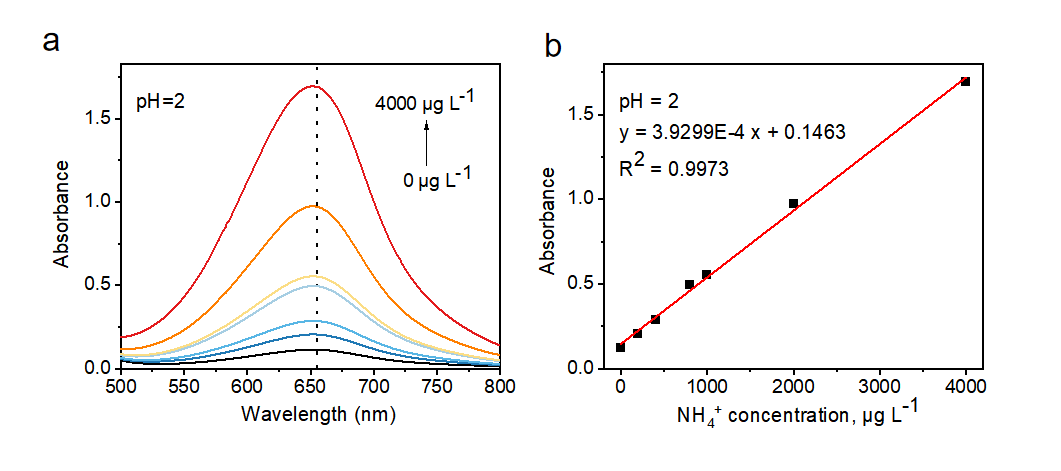
**

**Supplementary Fig. 9.** (**a**) UV-Vis spectra of various NH4+ concentrations at pH=2. (**b**) Calibration curve of the absorbance at 655 nm versus the concentration of NH4+ at pH=2.

**
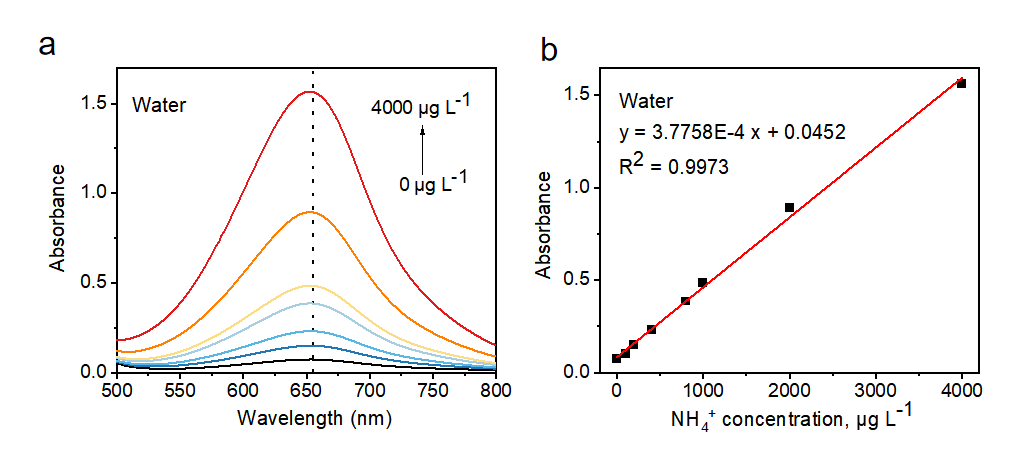
**

**Supplementary Fig. 10.** (**a**) UV-Vis spectra of various NH4+ concentrations in water. (**b**) Calibration curve of the absorbance at 655 nm versus the concentration of NH4+ in water.

**
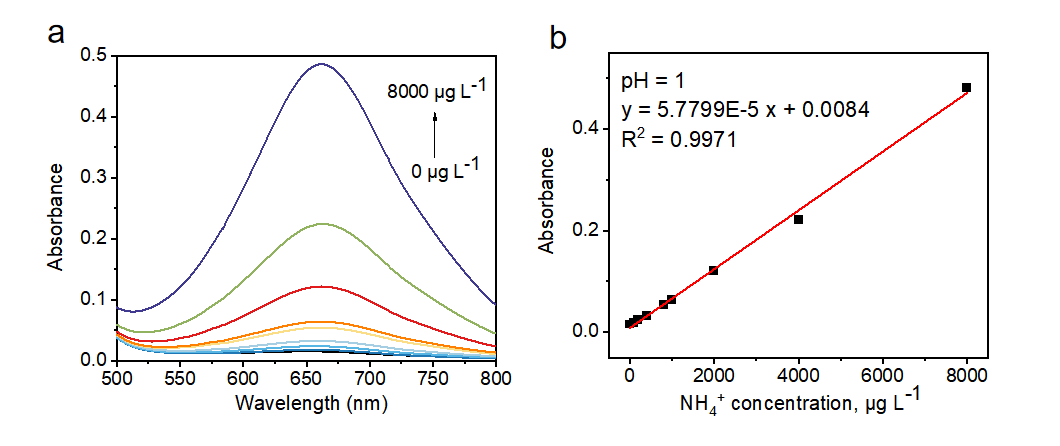
**

**Supplementary Fig. 11.** (**a**) UV-Vis spectra of various NH4+ concentrations in 0.1 M Na2SO3. (**b**) Calibration curve of the absorbance at 655 nm versus the concentration of NH4+. Calibration for the Berthelot spectrophotometric analysis of ammonia: UV-vis absorption spectra of a solution prepared by mixing 2 mL of a defined amount of NH4+ in 0.1 M Na2SO3 with 2 ml of a 1 M NaOH solution that contained salicylic acid and sodium citrate, 1 ml of 3 M NaClO, and 0.2 ml of 1 wt% Na2[Fe(CN)5NO]•2H2O.


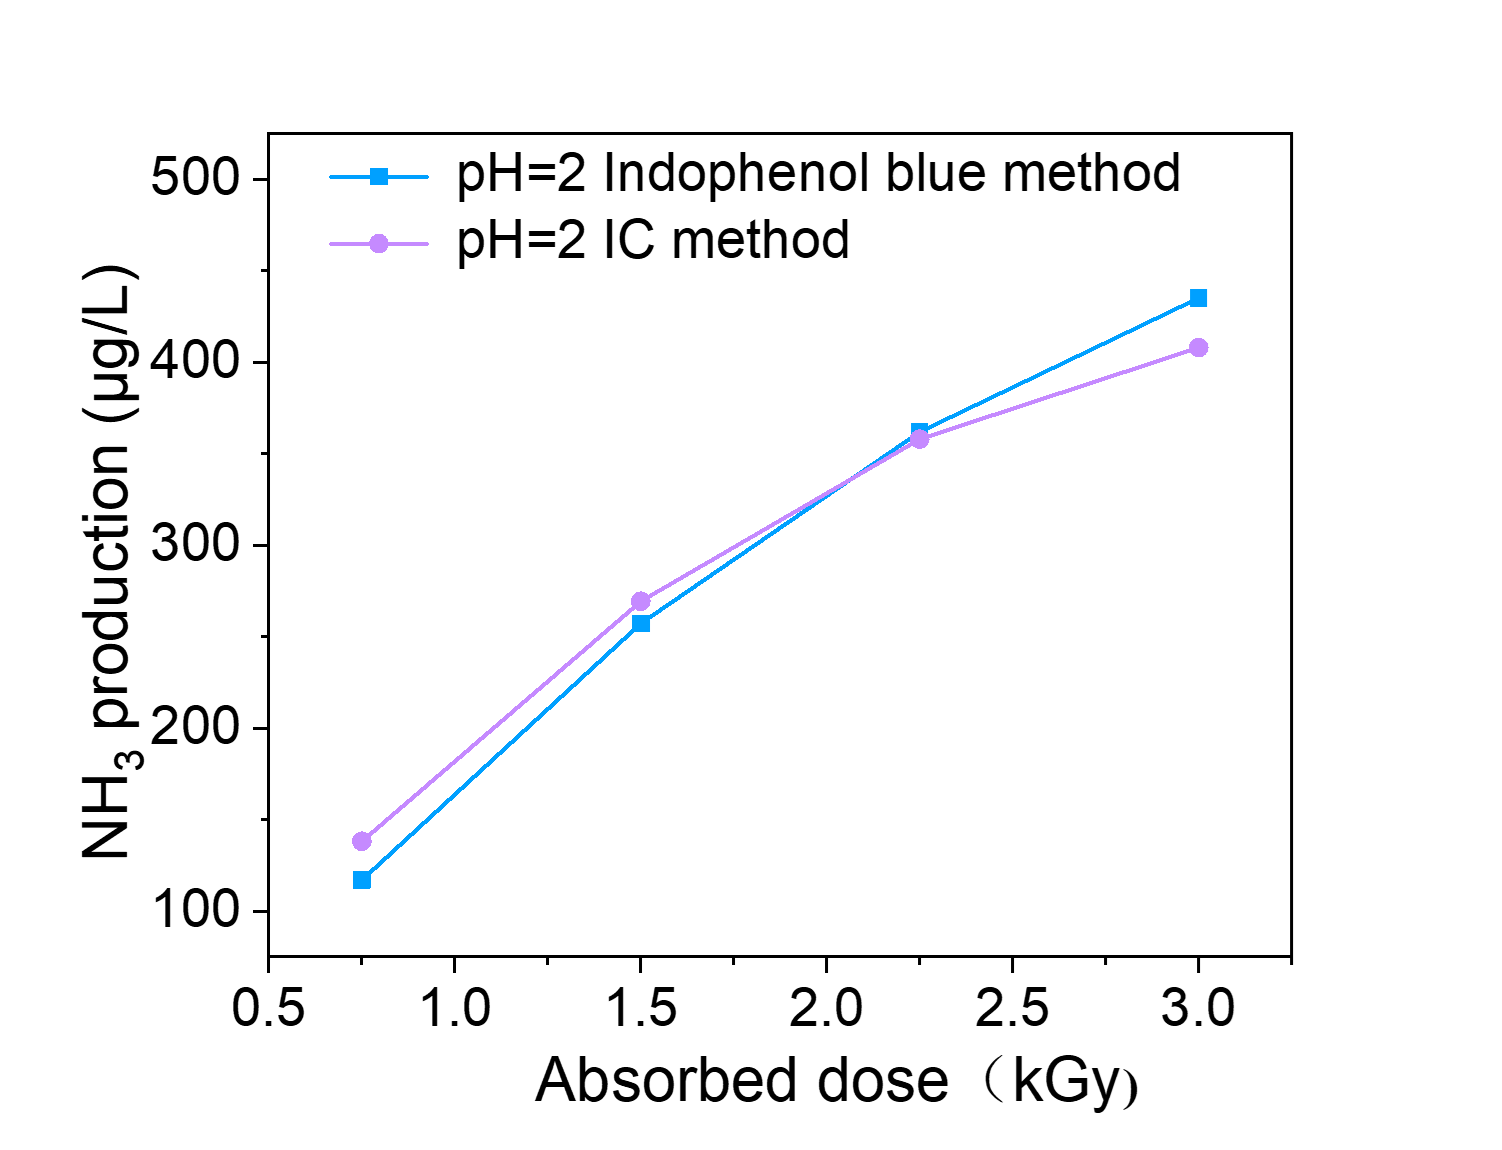


**Supplementary Fig. 12.** Performance comparison of different ammonia quantification methods for 100 mg UiO-66-NH2 at pH=2.


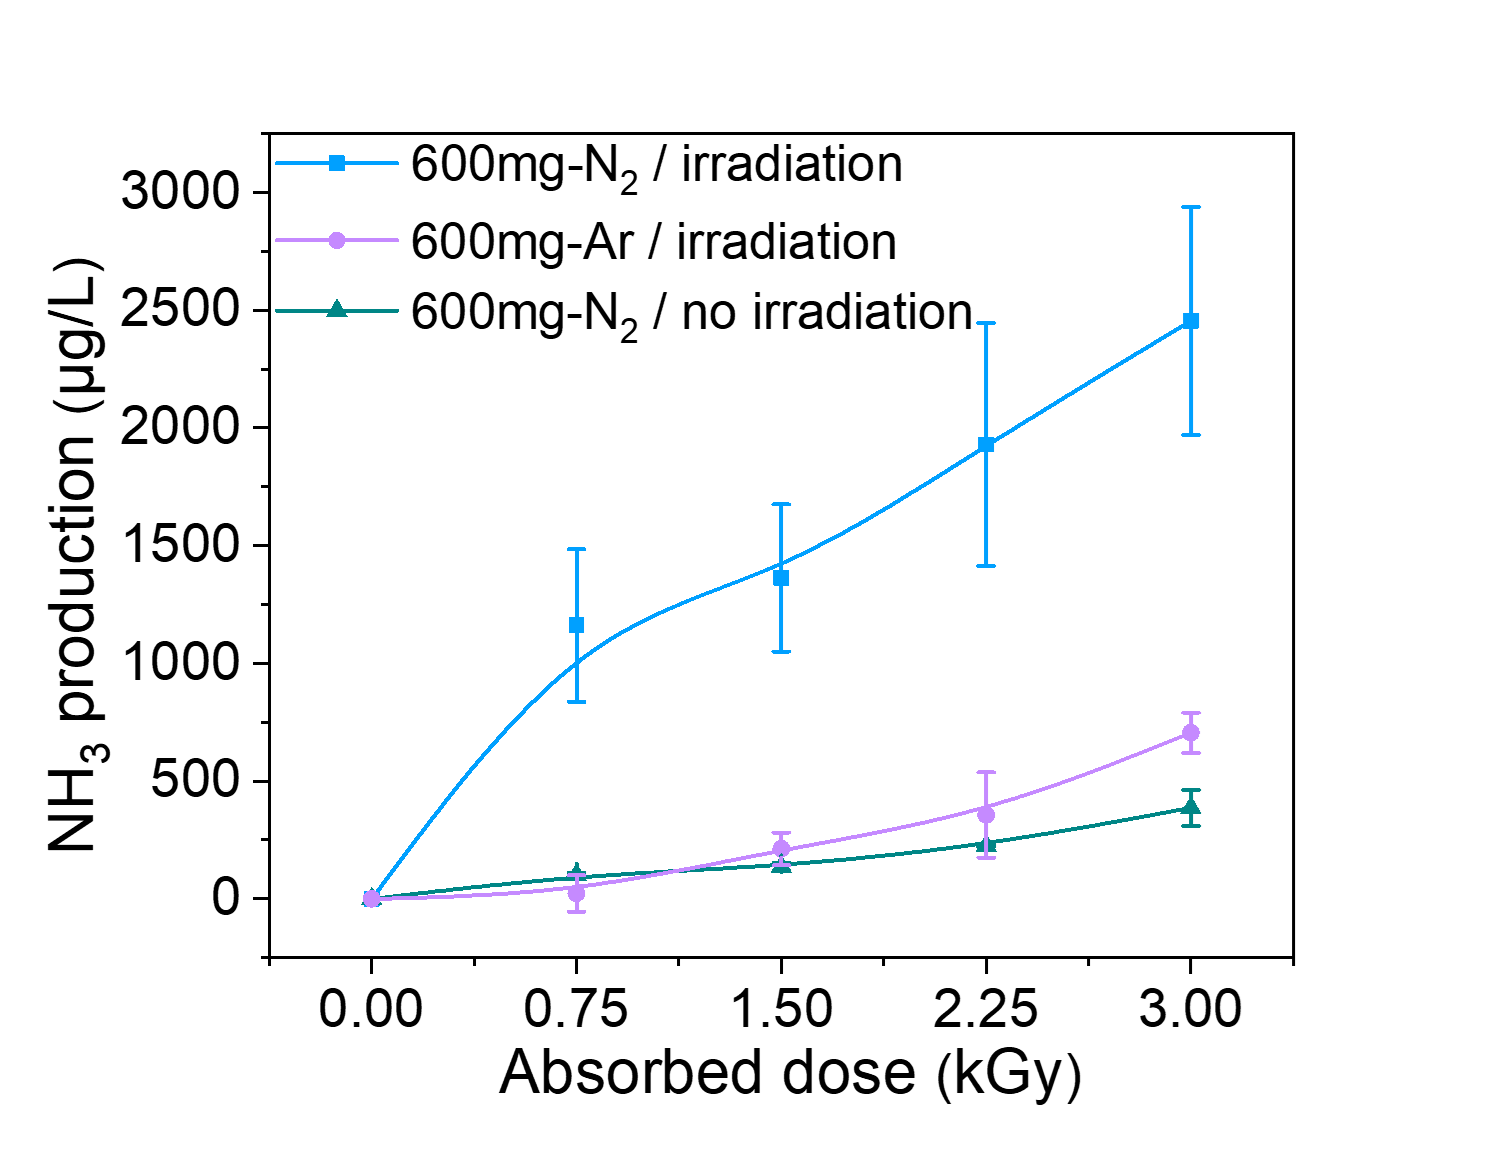


**Supplementary Fig. 13.** Effect of N2 without X-ray irradiation and Ar with irradiation on ammonia production at pH=1 H2SO3 solution (HCl as a regulator).

**Part 4 Pulse radiolysis**

**Pulse radiolysis experiments**

In the pulse radiolysis experiments, we utilized the picosecond laser-triggered electron accelerator, ELYSE, in conjunction with a time-resolved absorption spectrophotometric detection system. The laser (260 nm) driven Cs2Te photocathode allowed for the production of short electron pulses with a typical half-width of 7 ps, a charge of approximately 6 nC, and an energy of approximately 7.8 MeV at a repetition rate of 10 Hz.

During the irradiation process, the sample solutions were contained in a fused cell with a path length of 5 mm, which was connected to a closed circulation system from a 100 mL stock solution. The sample in the irradiation cell was renewed after each pulse using a peristaltic pump with a flow rate of 100 mL/min. The diameter of the electron beam was 3 mm, and the irradiated volume was less than 0.1 mL.

Absorption spectral measurements were conducted using the white light from a homemade Xenon flash lamp. The light was focused on the sample parallel to the electron beam with a smaller diameter and then directed onto a flat field spectrograph (Chromex 250IS). This setup dispersed the light on the entrance optics of a high dynamic range streak camera (model C-7700-01 from Hamamatsu) to obtain an image resolved in wavelength and time. The kinetic data and absorption spectra were extracted from three series of 200 resulting images. In this study, the transient spectra were measured from 290 to 720 nm.

**
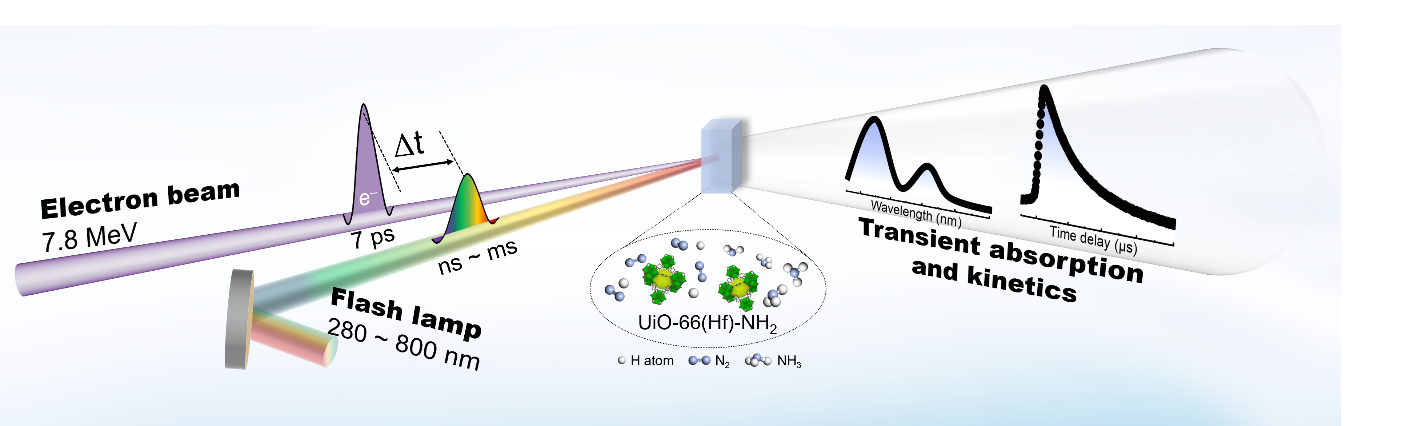
**

**Supplementary Fig. 14.** Schematic diagram of transient absorption spectral pulse radiolysis device for studying solvated electrons in MOF solutions.

**
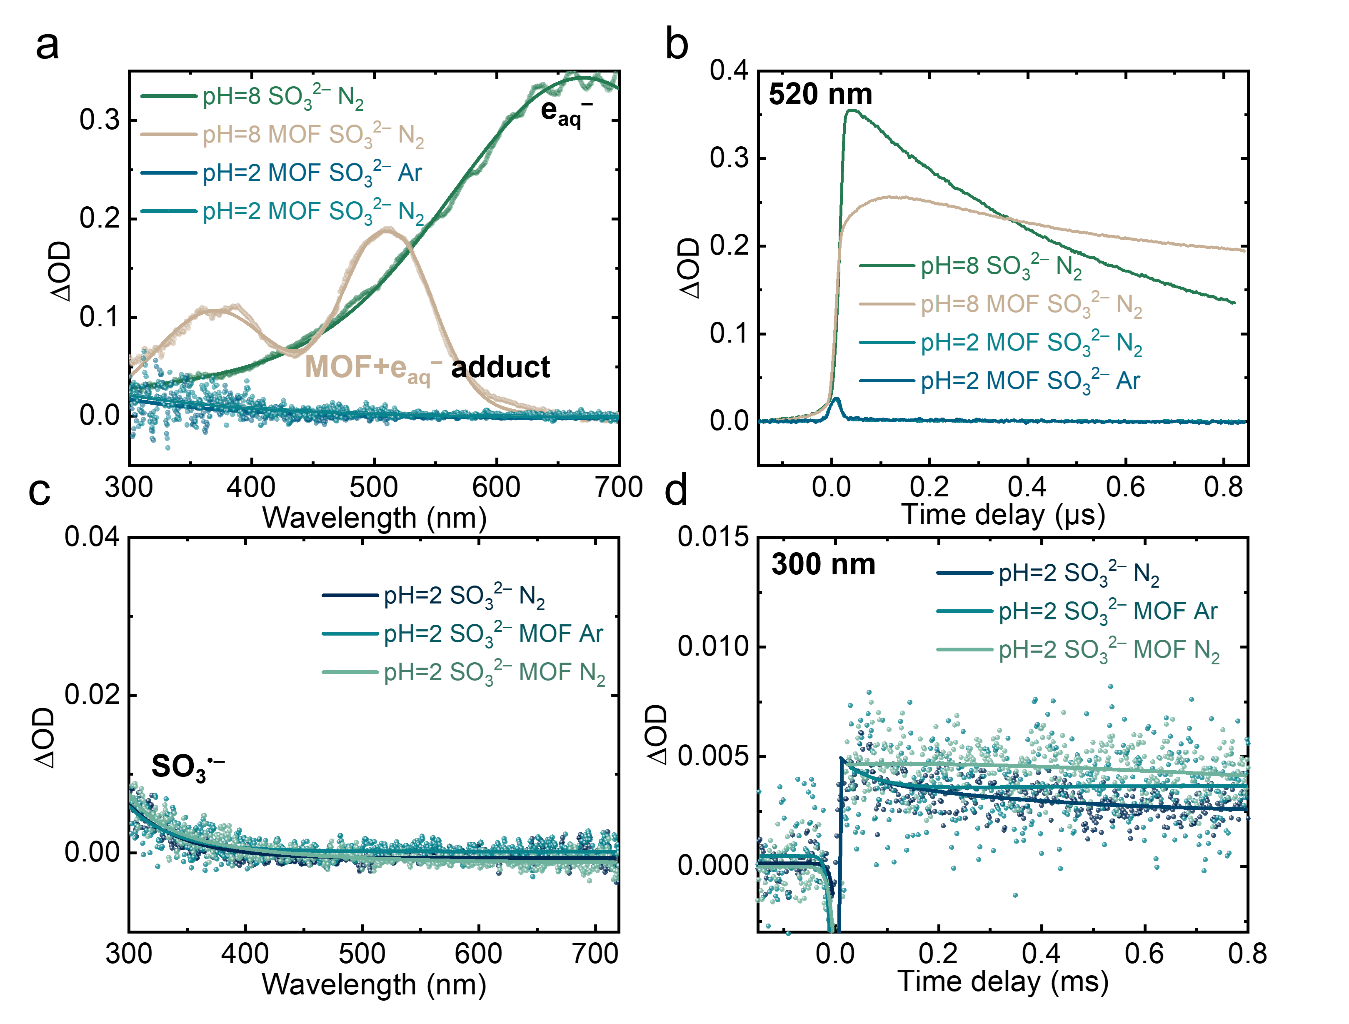
**

**Supplementary Fig. 15. Transient absorption matrix within 820 µs recorded by pulse radiolysis of N2 or Ar-saturated solution containing H2SO3 solution (pH=2 or 8).** a. Transient absorption spectra at 0.8 µs and 800 µs for UiO-66-NH2 or pure solution. b Transient kinetics within 800 µs for UiO-66-NH2 or pure solutionat 520 nm. c Transient absorption spectra at 0.8 µs and 800 µs for UiO-66-NH2 or pure solution. d Transient kinetics within 800 µs for UiO-66-NH2 or pure solution at 300 nm.

**Part 4 Fast and scalable synthesis of catalyst (UiO-66(Hf)-NH2)**

In pursuit of synthesizing a substantial quantity of catalysts for the large-scale radiation synthesis of ammonia, we devised a hydrothermal scheme. This scheme facilitates the rapid synthesis of G-class UiO-66 within a 2-hour timeframe, showcasing exceptional crystallinity ideal for small modular radiation catalysis applications

**Synthesis of UiO-66(Hf)-Type MOF**

In a typical synthesis, a mixture of HfCl4 (3.36 g, 10.5 mmol), 2-hydroxyterephthalic acid or 2-aminoterephthalic acid (10 mmol), acetic acid (40 mL) in water (60 mL) was heated at 100°C for 48 h. The resulting particles were isolated by centrifugation (8000 rpm for 5 min) and completely washed with methyl alcohol. Then, the resulting solids were dried in air at 80°C to generate nanoscale UiO-66-NH2(Hf) or UiO-66-OH(Hf) as crystalline solids.


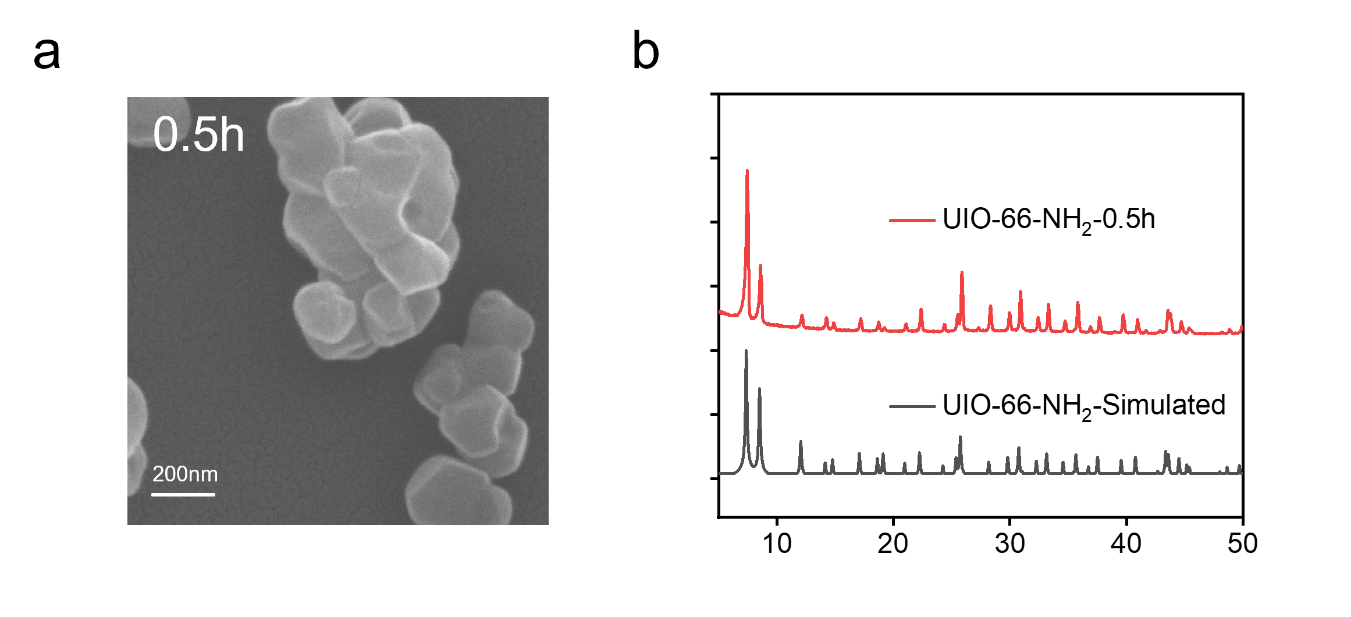


**Supplementary Fig. 16.** SEM (**a**) and XRD (**b**) patterns of UiO-66-NH2 synthesized by heating oil bath for 0.5 h.

**
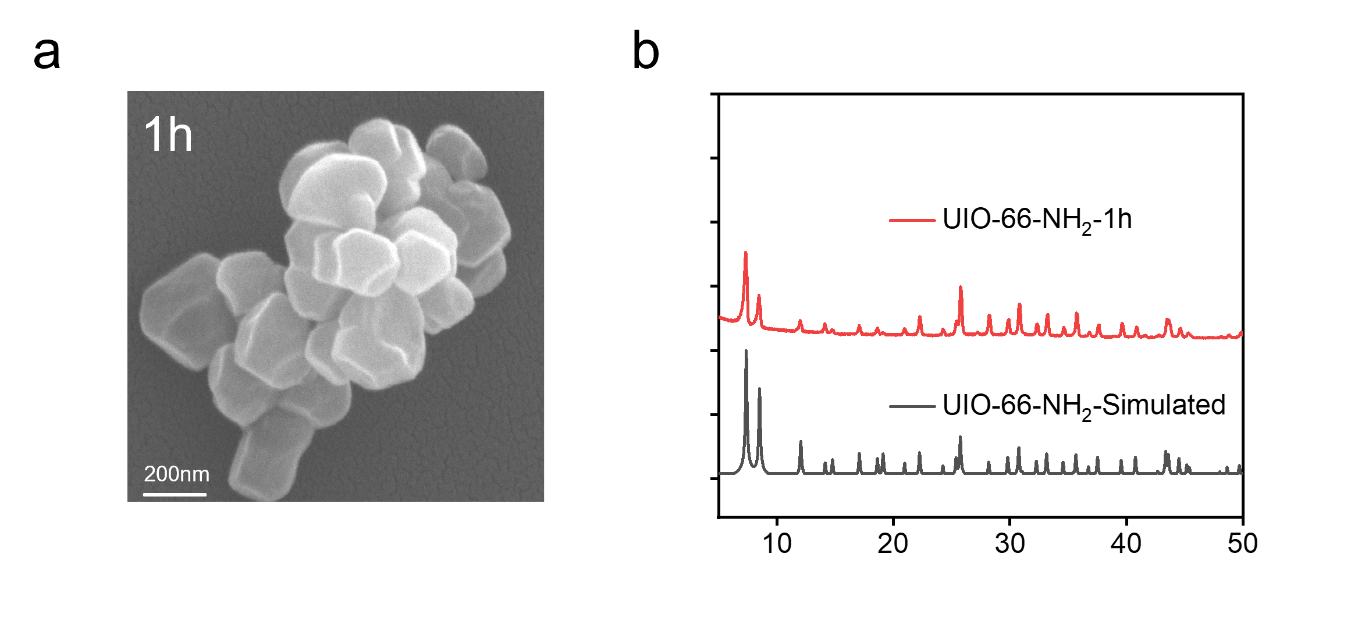
**

**Supplementary Fig. 17.** SEM (**a**) and XRD (**b**) patterns of UiO-66-NH2 synthesized by heating oil bath for 1 h.


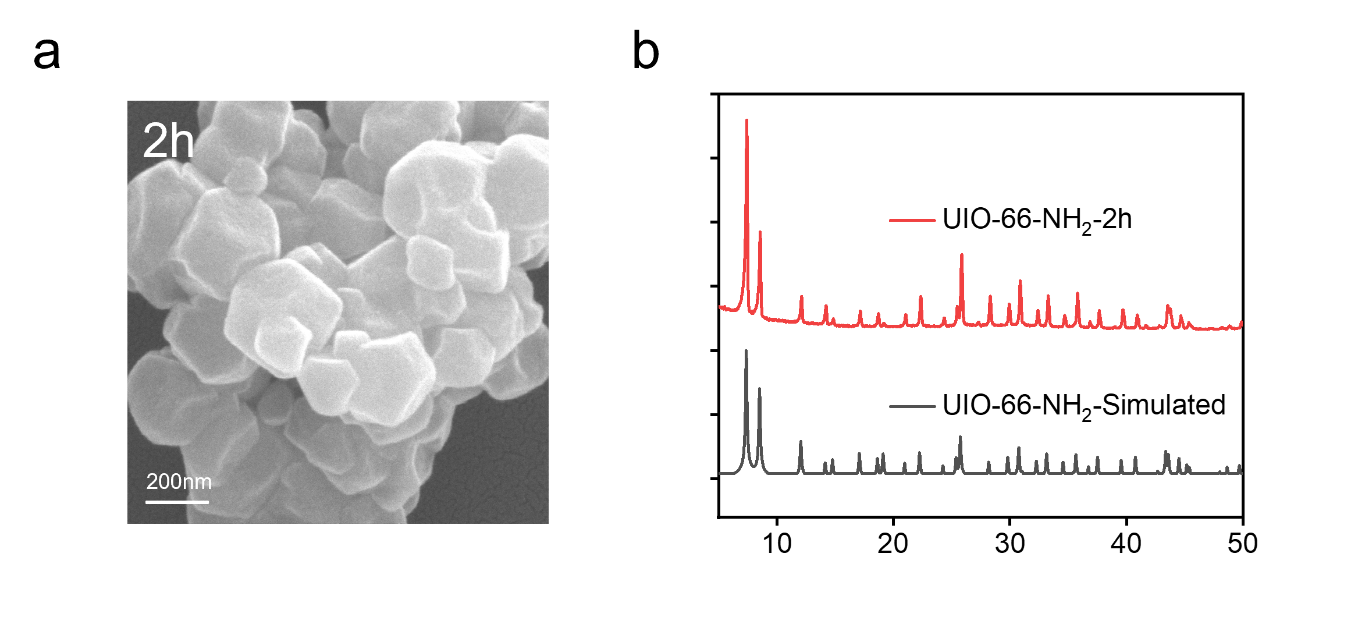


**Supplementary Fig. 18.** SEM (**a**) and XRD (**b**) patterns of UiO-66-NH2 synthesized by heating oil bath for 2 h.


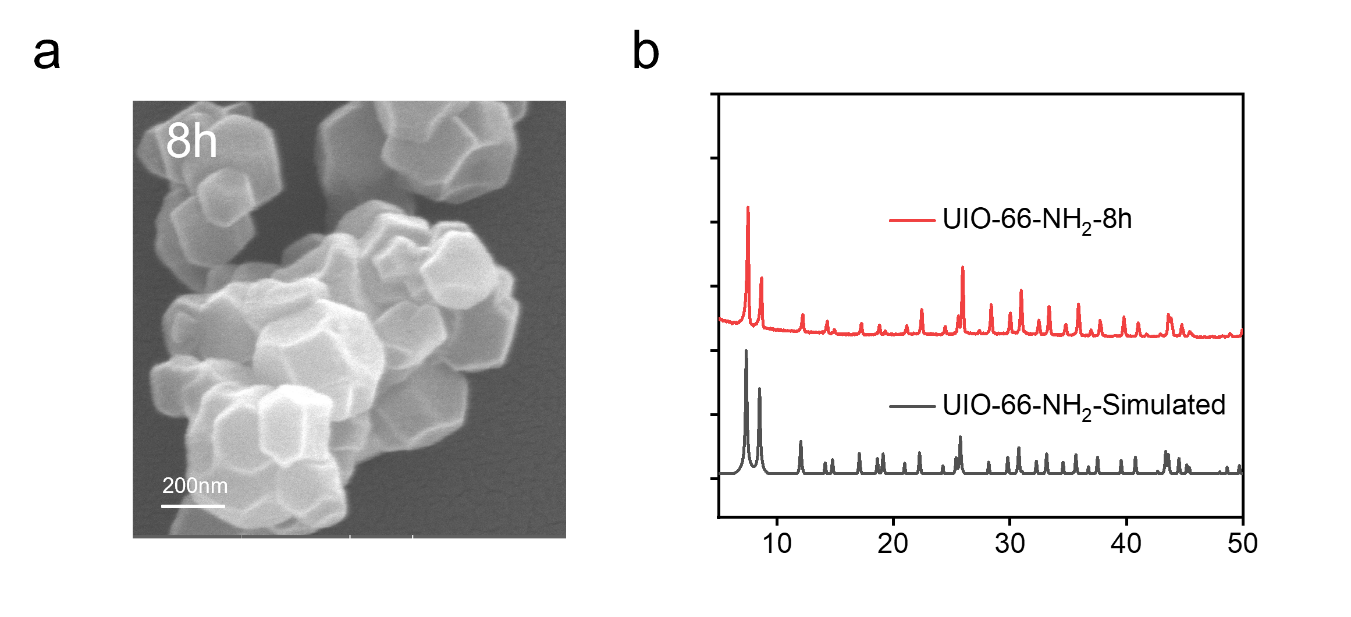


**Supplementary Fig. 19**. SEM (**a**) and XRD (**b**) patterns of UiO-66-NH2 synthesized by heating oil bath for 8 h.


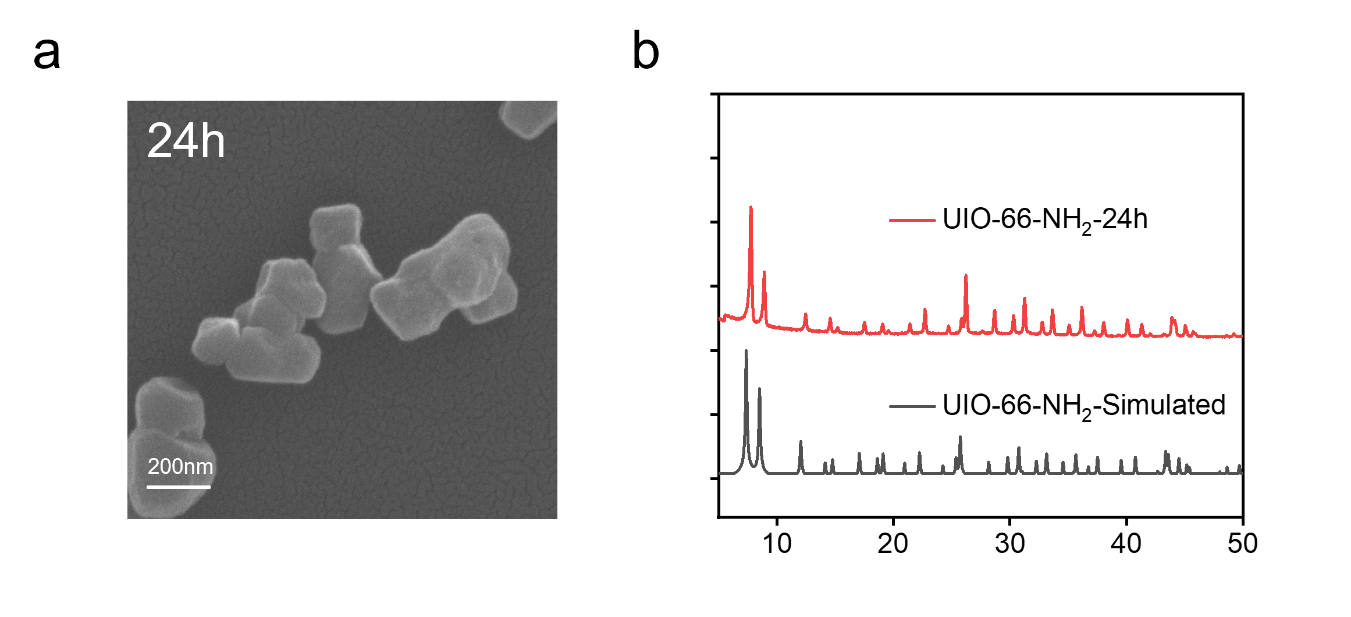


**Supplementary Fig. 20**. SEM (**a**) and XRD (**b**) patterns of UiO-66-NH2 synthesized by heating oil bath for 24 h.


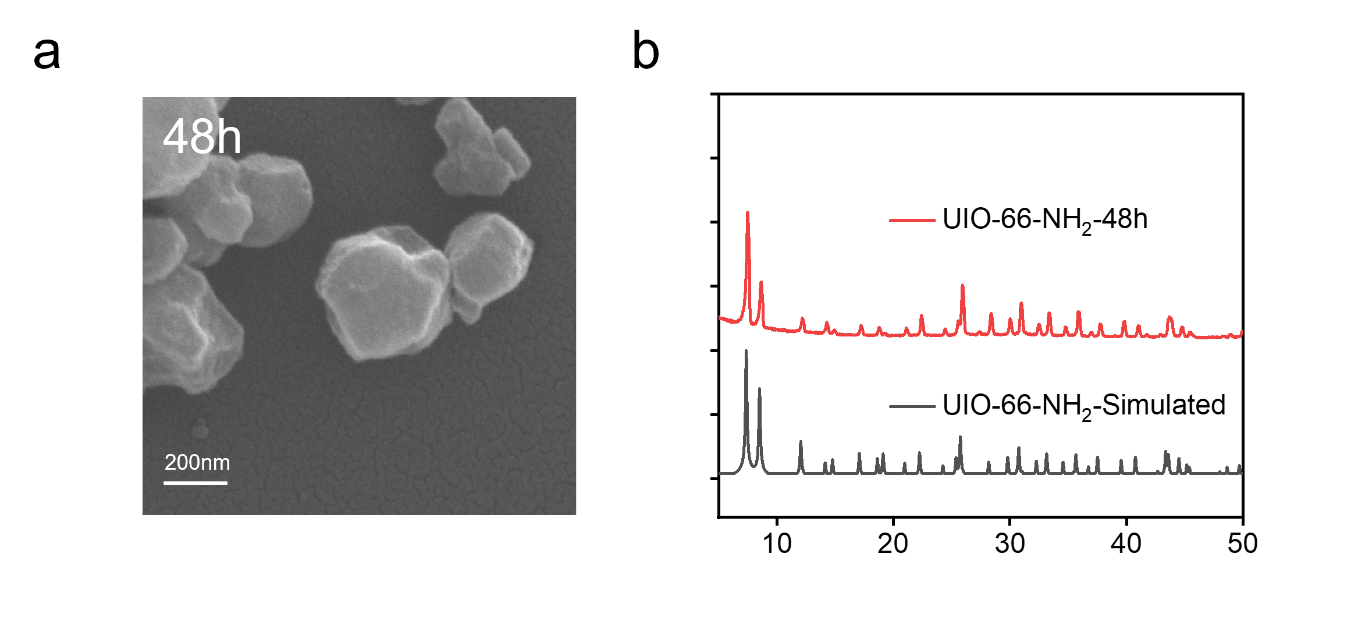


**Supplementary Fig. 21**. SEM (**a**) and XRD (**b**) patterns of UiO-66-NH2 synthesized by heating oil bath for 48 h.


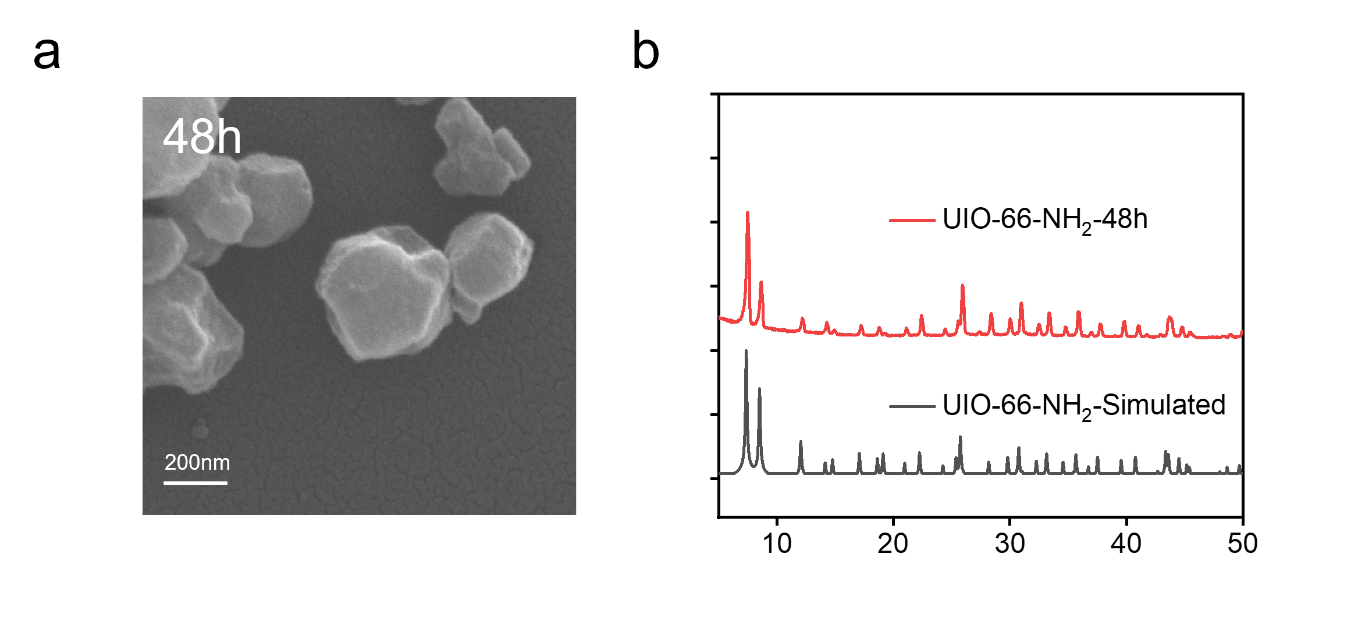


**Supplementary Fig. 22.** SEM (**a**) and XRD (**b**) patterns of UiO-66-NH2 synthesized by heating oven for 48 h.

**Part 4 Supplementary experiment for NRR**


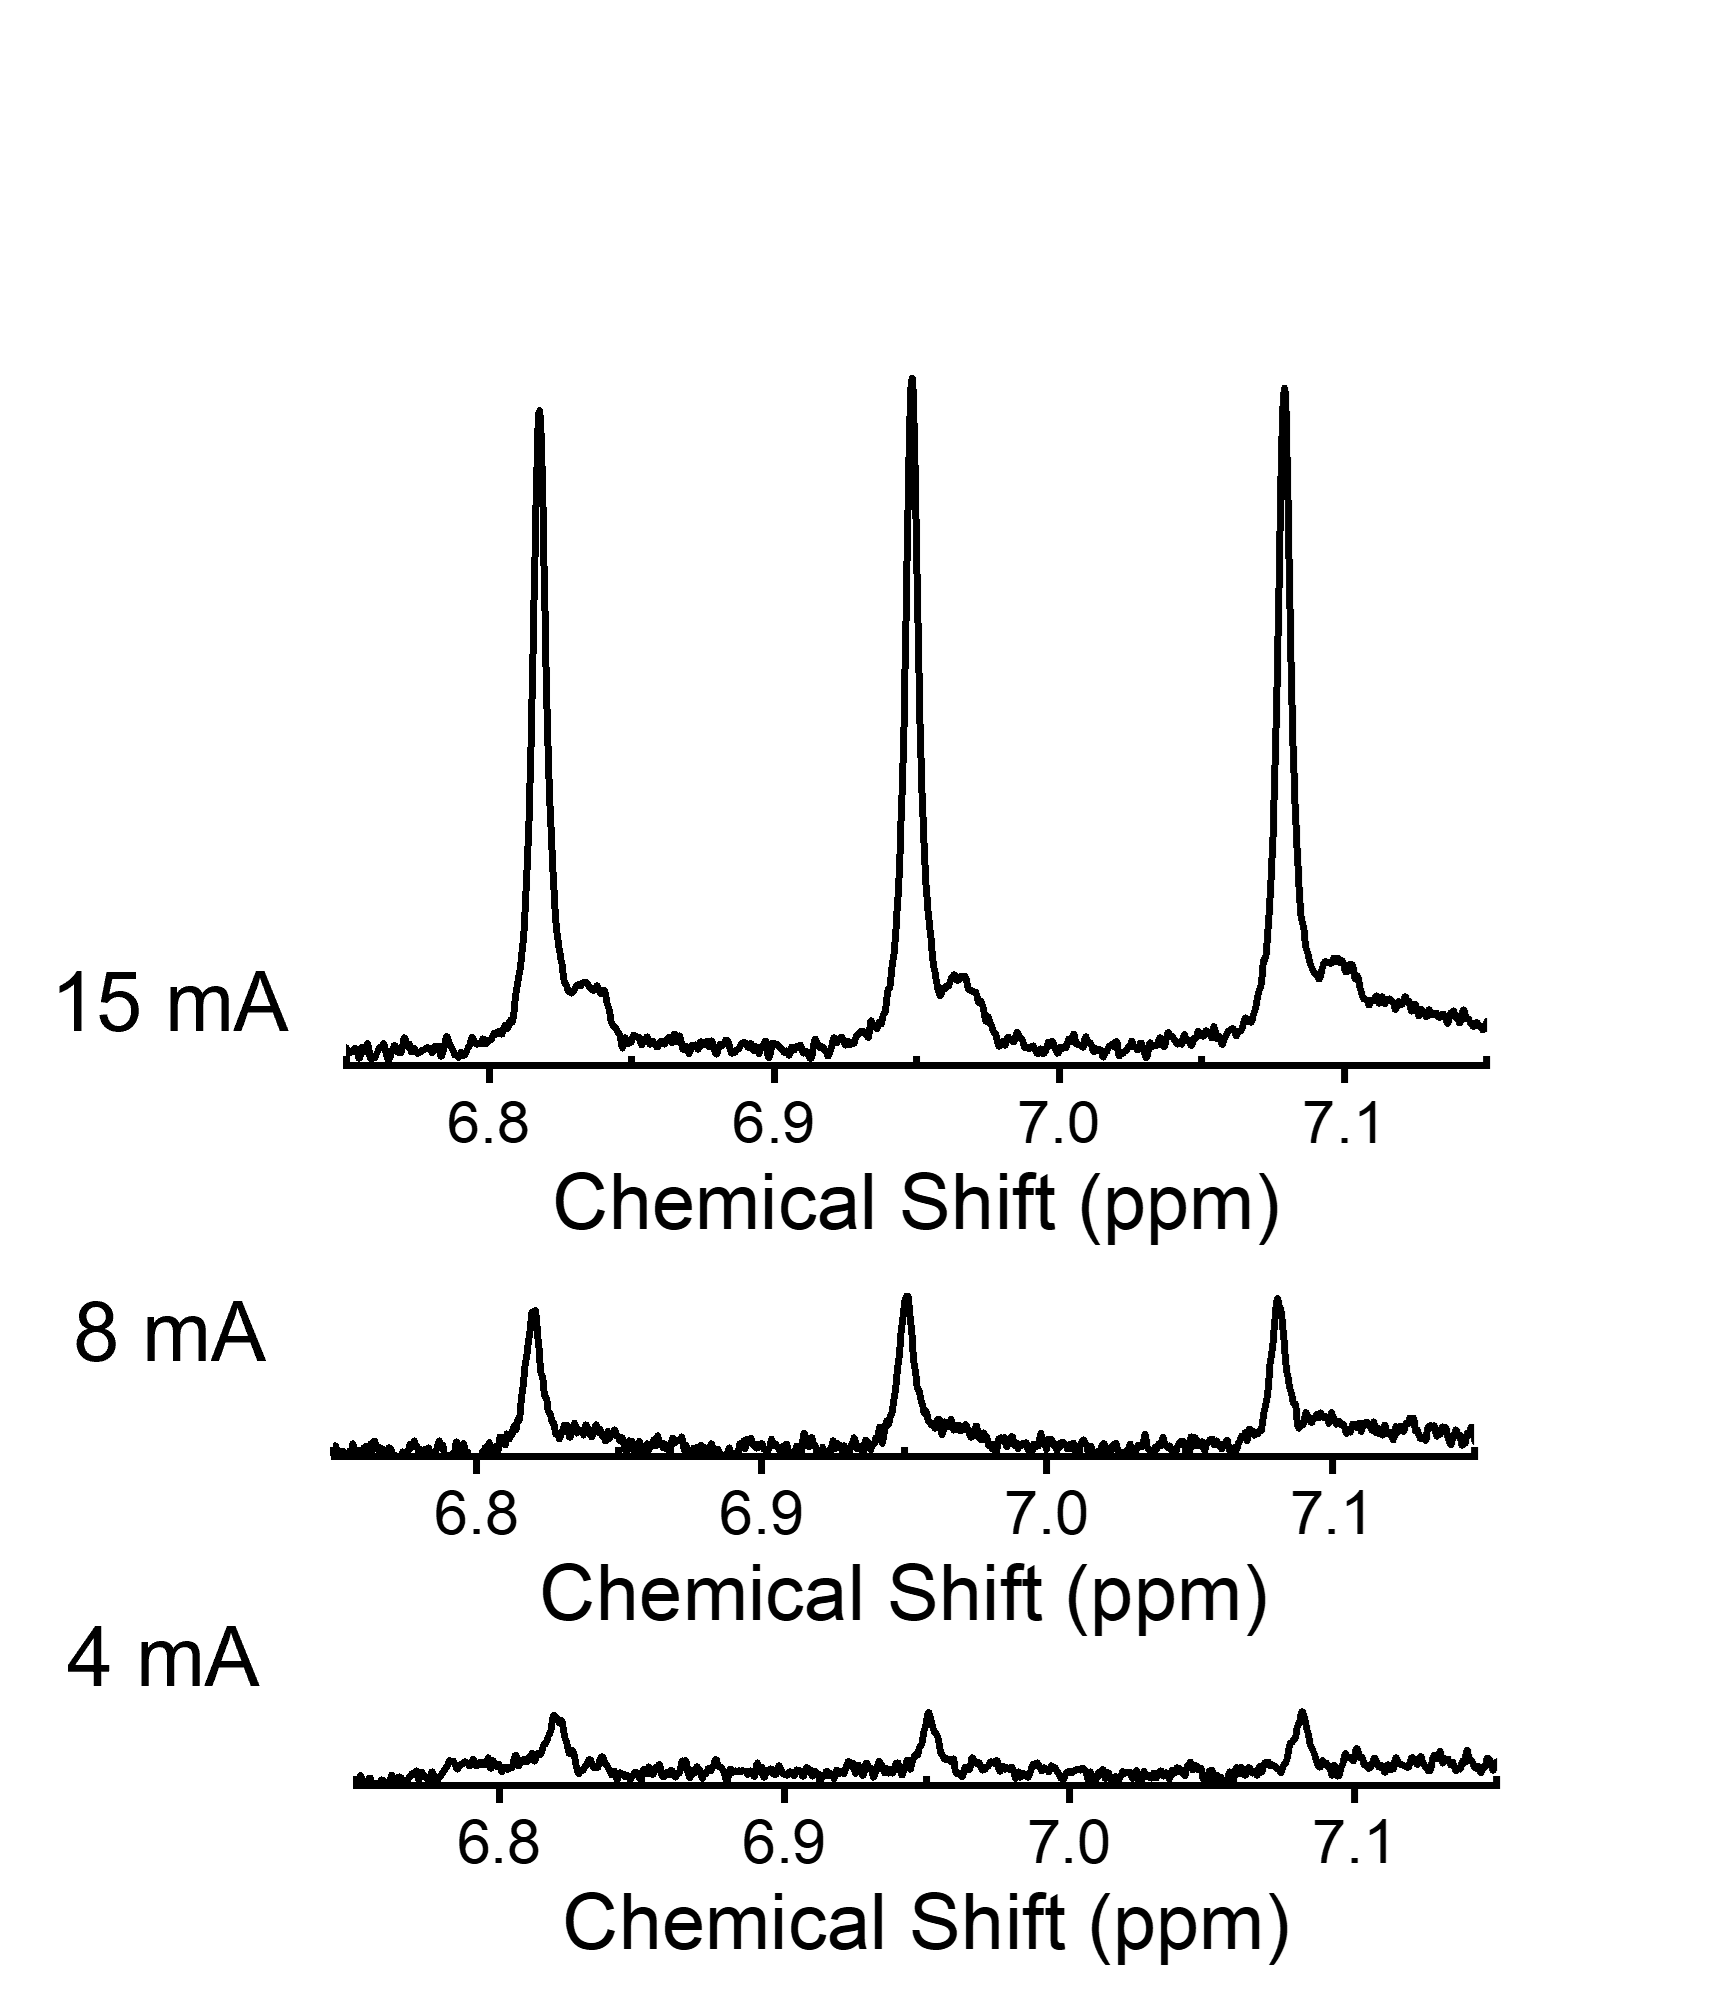


**Supplementary Fig. 23.** 1H NMR spectra of NH4+ (4mA, 8 mA, and 15mA) in aqueous media included a stand reference (maleic acid) and repetitive experiments using D2O.

**
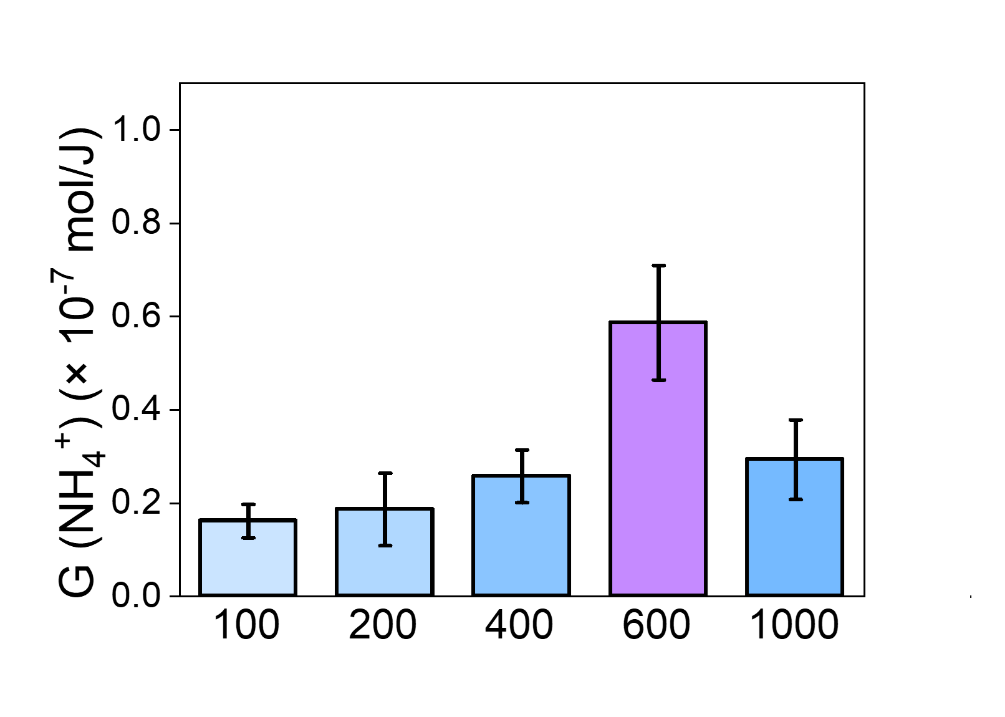
**

**Supplementary Fig. 24.** The amplified C-product in G-value by the increase of UiO-66-NH2 mass fraction.


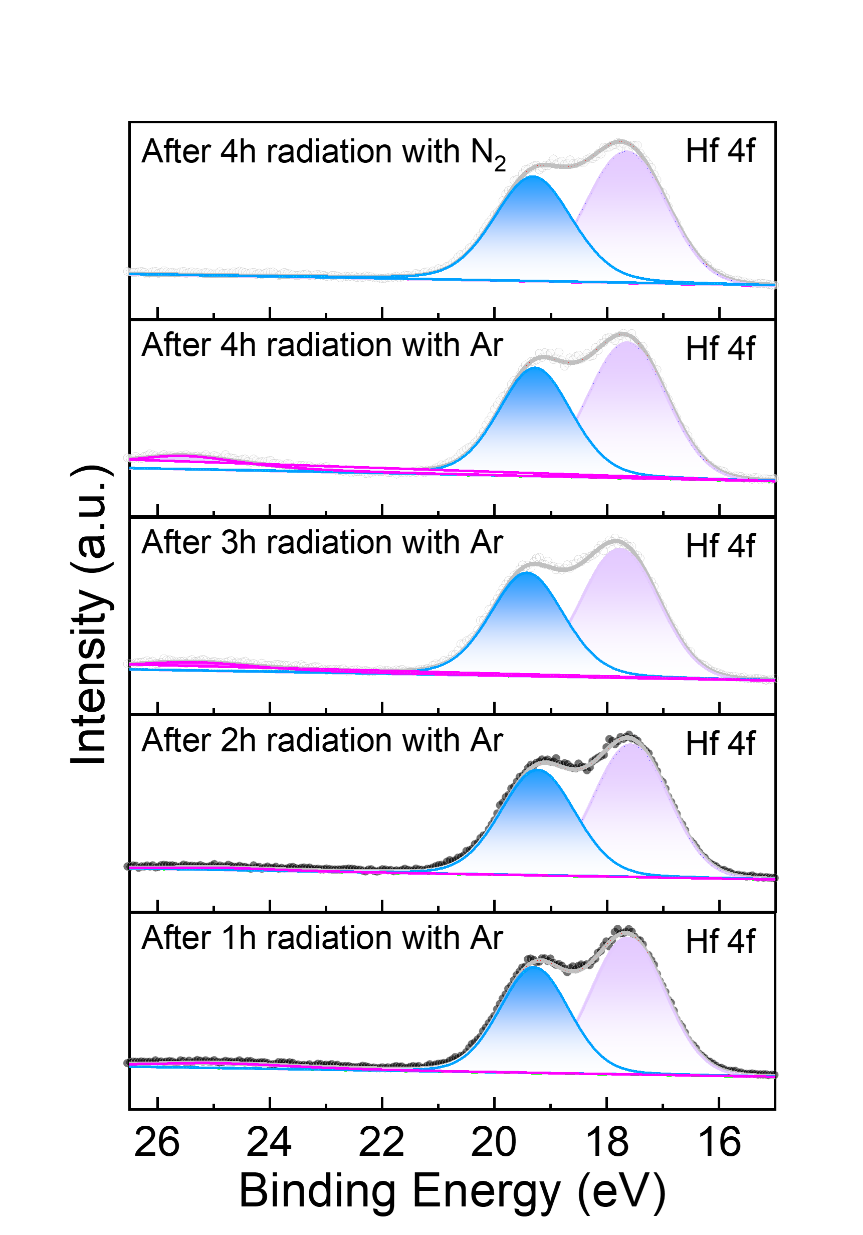


**Supplementary Fig. 25.** XPS of UiO-66-NH2 irradiated by Ar or N2 at different time.


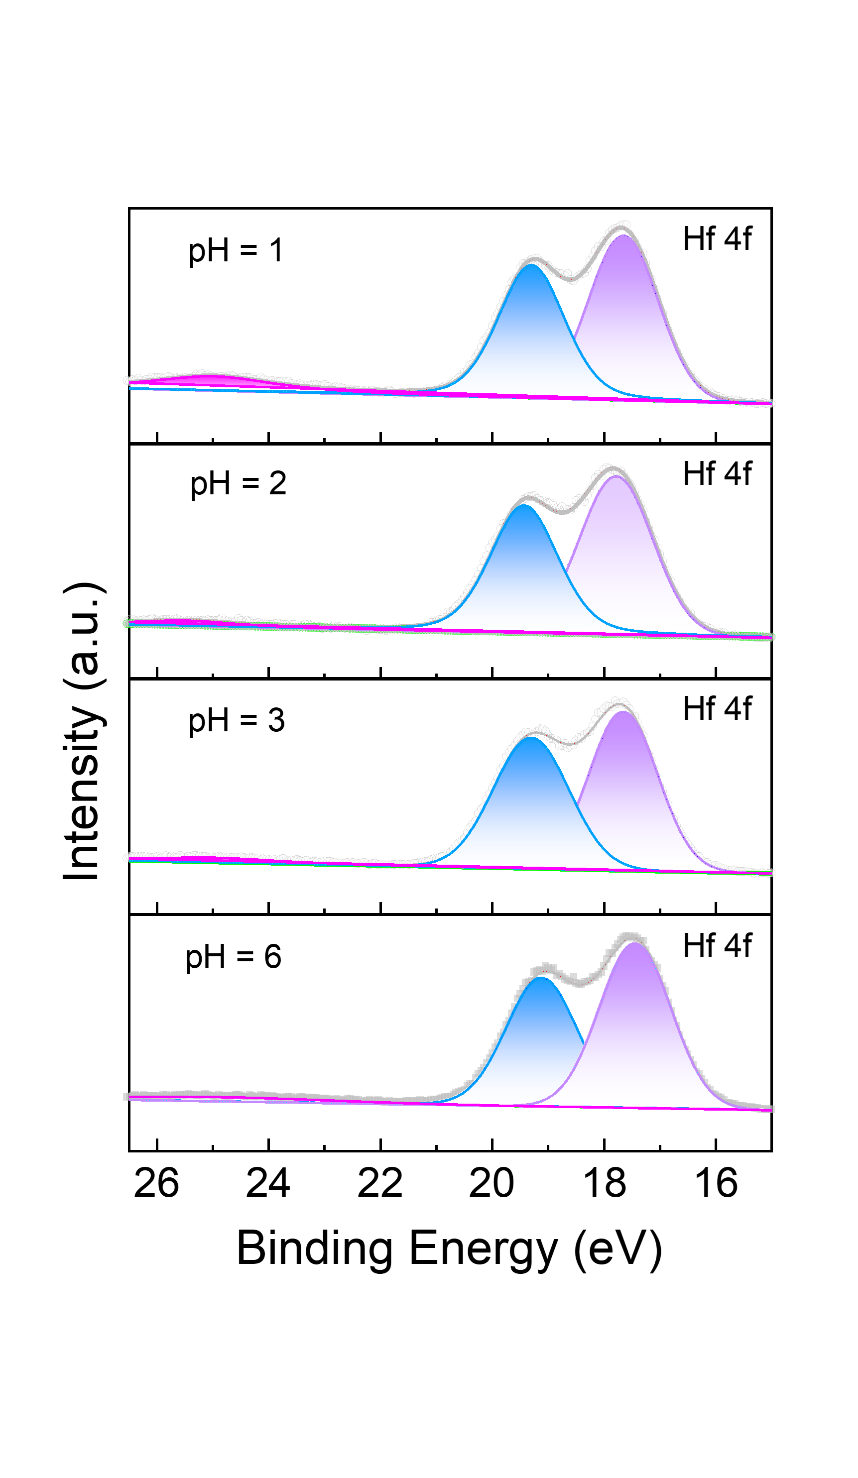


**Supplementary Fig.26.** XPS of UiO-66-NH2 irradiated by Ar at different pH.


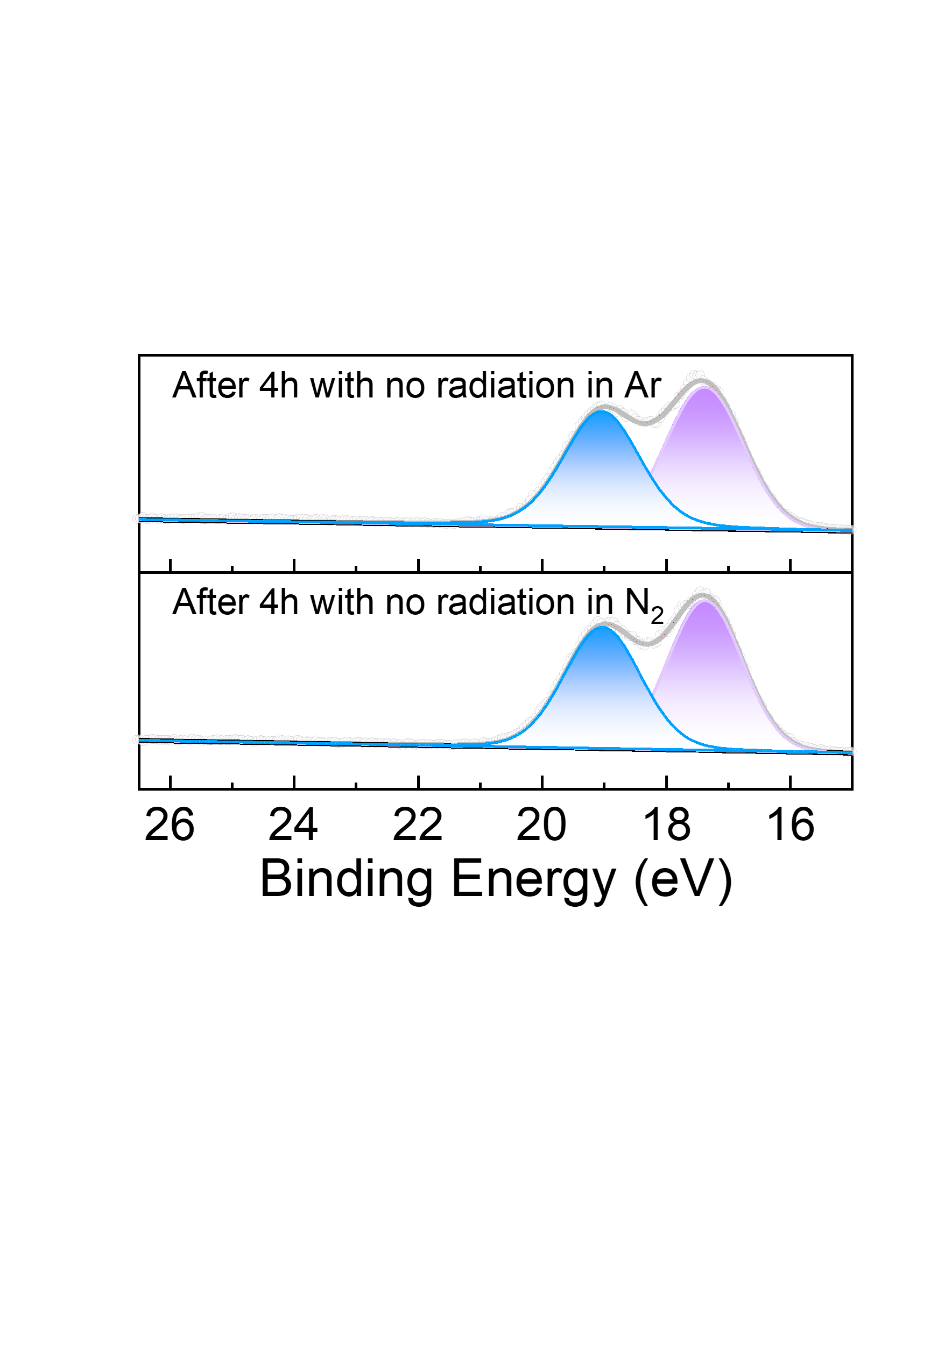


**Supplementary Fig. 27.** XPS of UiO-66-NH2 is not irradiated after 4 hours in Ar or N2.


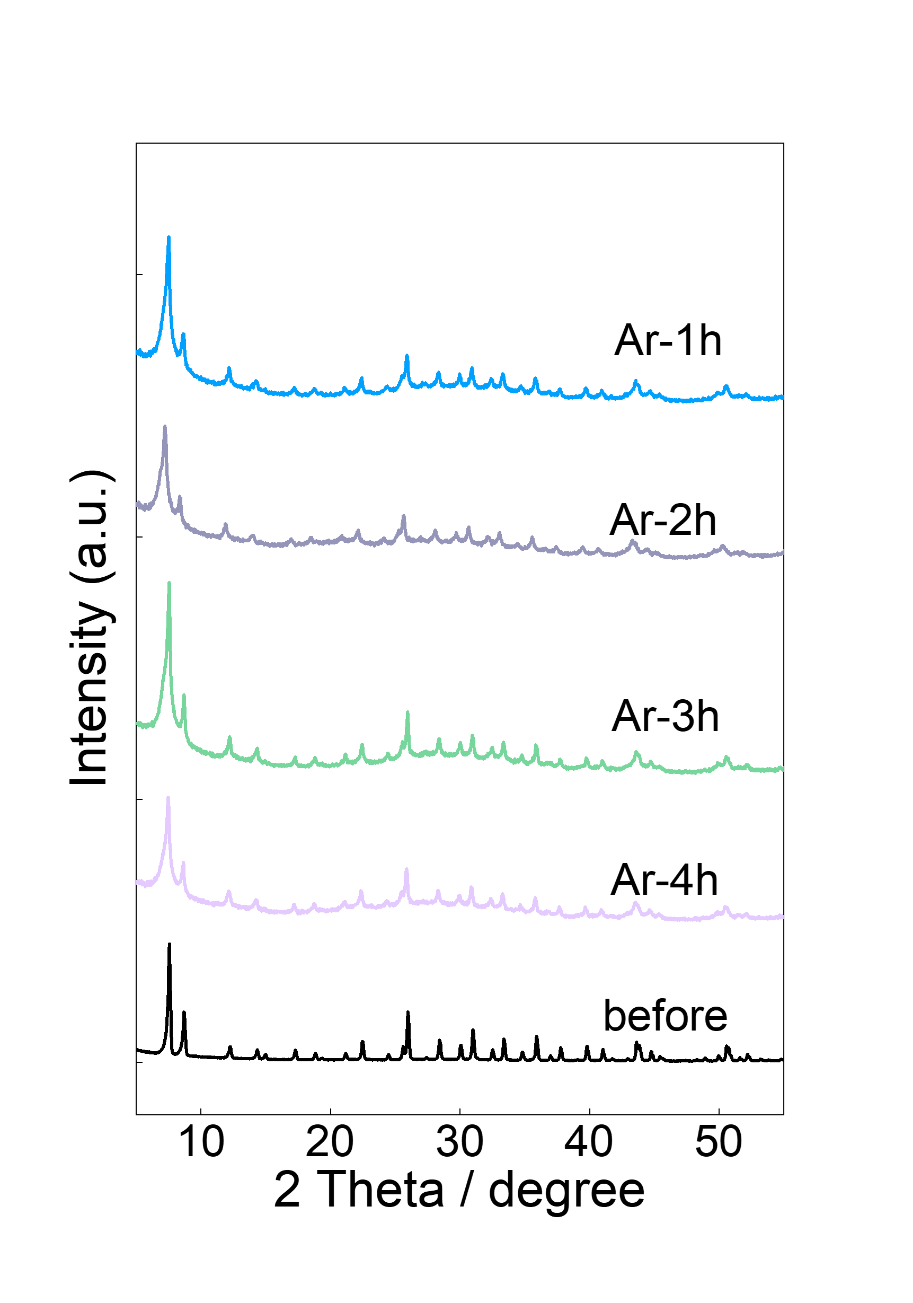


**Supplementary Fig. 28.** XRD of UiO-66-NH2 irradiated under argon at different time.


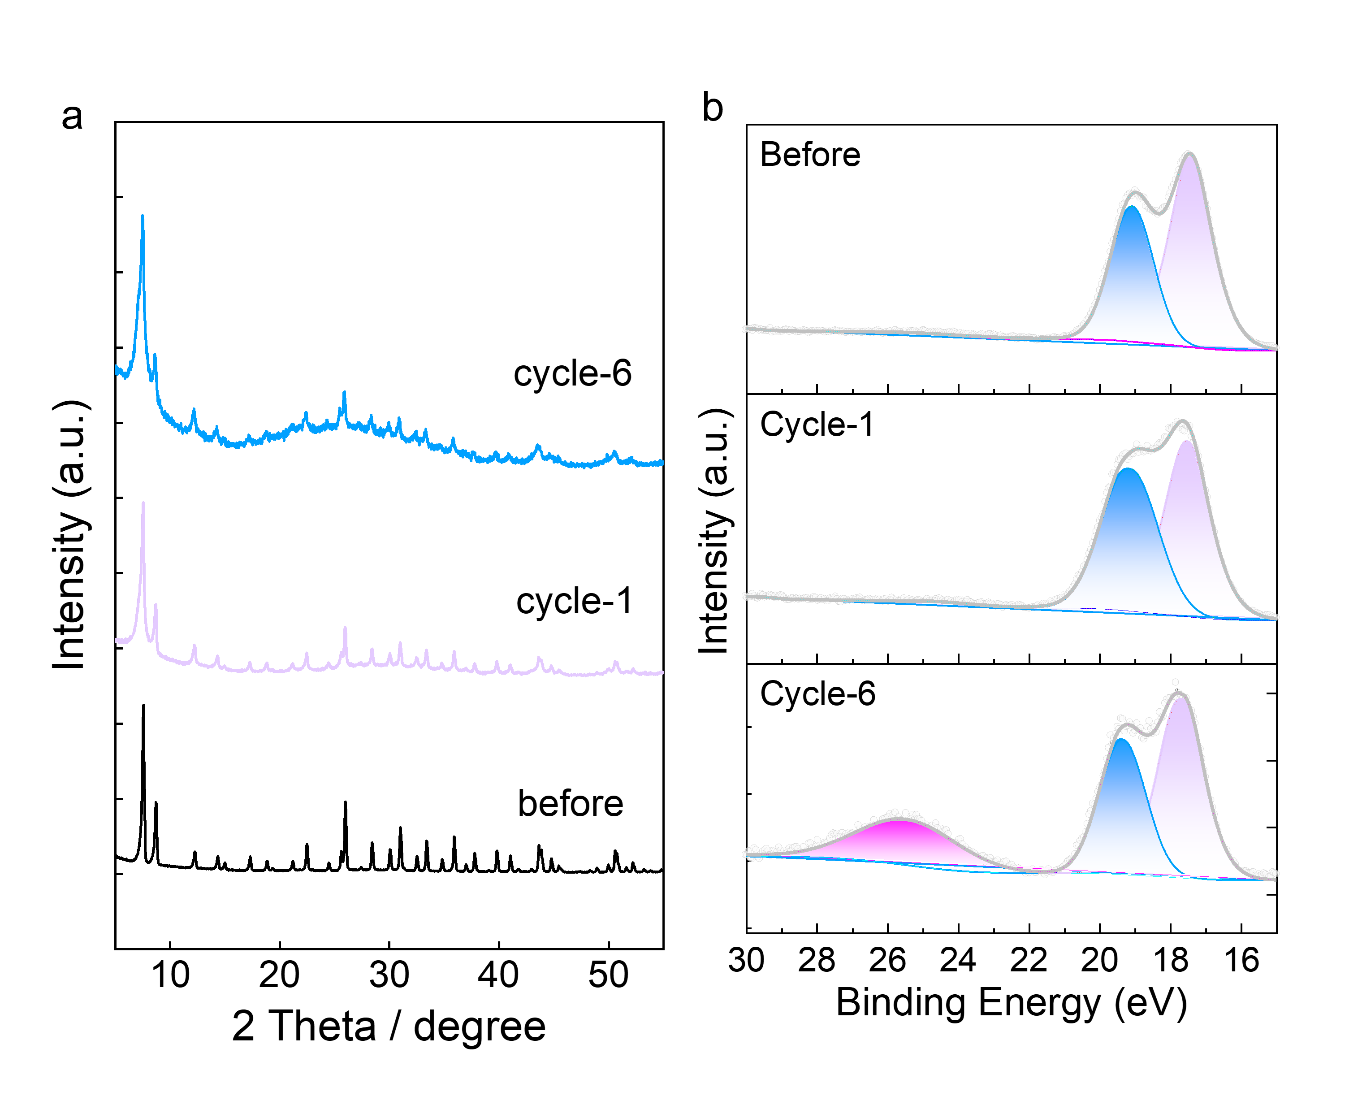


**Supplementary Fig. 29.** XRD (**a**) and XPS (**b**) spectra of 100 mg UiO-66-Hf-NH2 before and after 6 cycles with 18 kGy irradiation for NH4+ production.


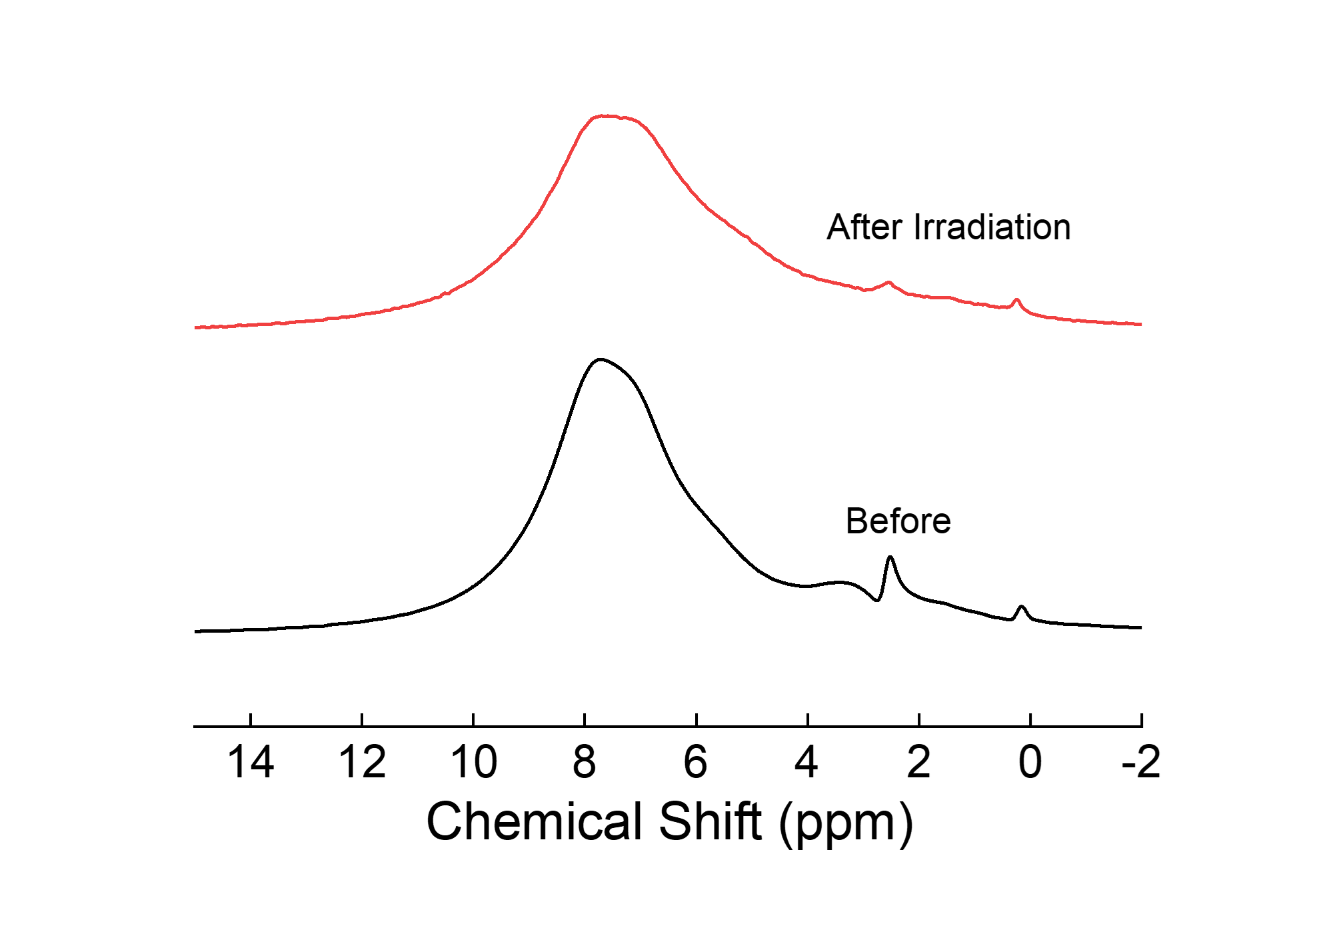


**Supplementary Fig. 30.** 1H MAS NMR spectra of 100 mg UiO-66-Hf-NH2 before and after 6 cycles.

**Reference**

1. T.-N. Ye, S.-W. Park, Y. Lu, J. Li, M. Sasase, M. Kitano, T. Tada, H. Hosono, Vacancy-enabled N2 activation for ammonia synthesis on an Ni-loaded catalyst. *Nature*. **583**, 391-395 (2020).
2. J. Humphreys, R. Lan, S. Tao, Development and recent progress on ammonia synthesis catalysts for Haber–Bosch process. *ADV ENERG SUST RES*. **2**, 2000043 (2021).
3. S. Z. Andersen, V. Čolić, S. Yang, J. A. Schwalbe, A. C. Nielander, J. M. McEnaney, K. Enemark-Rasmussen, J. G. Baker, A. R. Singh, B. A. Rohr, M. J. Statt, S. J. Blair, S. Mezzavilla, J. Kibsgaard, P. C. K. Vesborg, M. Cargnello, S. F. Bent, T. F. Jaramillo, I. E. L. Stephens, J. K. Nørskov, I. Chorkendorff, A rigorous electrochemical ammonia synthesis protocol with quantitative isotope measurements. *Nature*. **570**, 504-508 (2019).
4. K. Li, S. Z. Andersen, M. J. Statt, M. Saccoccio, V. J. Bukas, K. Krempl, R. Sažinas, J. B. Pedersen, V. Shadravan, Y. Zhou, D. Chakraborty, J. Kibsgaard, P. C. K. Vesborg, J. K. Nørskov, I. Chorkendorff, Enhancement of lithium-mediated ammonia synthesis by addition of oxygen. *Science*. **374**, 1593-1597 (2021).
5. B. H. R. Suryanto, K. Matuszek, J. Choi, R. Y. Hodgetts, H.-L. Du, J. M. Bakker, C. S. M. Kang, P. V. Cherepanov, A. N. Simonov, D. R. MacFarlane, Nitrogen reduction to ammonia at high efficiency and rates based on a phosphonium proton shuttle. *Science*. **372**, 1187-1191(2021).
6. H.-L. Du, M. Chatti, R. Y. Hodgetts, P. V. Cherepanov, C. K. Nguyen, K. Matuszek, D. R. MacFarlane, A. N. Simonov, Electroreduction of nitrogen with almost 100% current-to-ammonia efficiency. *Nature*. **609**, 722-72 (2022).
7. D. F. Swearer, N. R. Knowles, H. O. Everitt, N. J. Halas, Light-driven chemical looping for ammonia synthesis. *ACS Energy Lett*. **4**, 1505-1512 (2019).
8. G.-F. Han, F. Li, Z.-W. Chen, C. Coppex, S.-J. Kim, H.-J. Noh, Z. Fu, Y. Lu, C. V. Singh, S. Siahrostami, Q. Jiang, J.-B. Baek, Mechanochemistry for ammonia synthesis under mild conditions. *Nat. Nanotechnol*. 16, 325-330 (2021).
9. R. Hawtof, S. Ghosh, E. Guarr, C. Xu, R. Mohan Sankaran, J. N. Renner, Catalyst-free, highly selective synthesis of ammonia from nitrogen and water by a plasma electrolytic system. *Sci. Adv*. **5**, eaat5778 (2019).
10. H. Wang, R. R. Seemakurthi, G.-F. Chen, V. Strauss, O. Savateev, G. Hai, L. Ding, N. López, H. Wang, M. Antonietti, Laser-induced nitrogen fixation. *Nat. Commun*. **14**, 5668 (2023).
